# Supplementary material for: Photophysical origin of the reduced photodynamic therapy activity of temocene compared to Foscan®: insights from theory
Source: Royal Society of Chemistry journal article supplement (doi:10.1039/c3cp52698d), 2013-01-01
Supplement: c3cp52698d.pdf [file c3cp52698d.pdf]

## Supporting Information

Photophysical origin of the reduced photodynamic therapy activity of temocene compared to

Foscan®: Insights from theory

*Marta E. Alberto, Tiziana Marino, Angelo D. Quartarolo, Nino Russo\**

Dipartimento di Chimica e Tecnologie Chimiche, Università della Calabria, Cubo 14C, Via P.

Bucci 87036 Arcavacata di Rende (CS) Italy.

**Cartesian coordinates (Angstrom) for the ground ( $S_0$ ) and second electronic excited state ( $S_2$ ) optimized structures of *m*-THPPo calculated at PBE0/6-31G(d) level of theory.**

*m*-THPPo ( $S_0$ )

|   |             |             |             |
|---|-------------|-------------|-------------|
| C | -5.78501400 | 5.27853600  | -0.69112800 |
| C | -4.57095500 | 4.59496900  | -0.70813000 |
| C | -4.38642800 | 3.45662100  | 0.08107000  |
| C | -5.43826200 | 3.01197700  | 0.89740900  |
| C | -6.64683600 | 3.69719300  | 0.90510200  |
| C | -6.83129000 | 4.82733800  | 0.11505000  |
| H | -3.77999900 | 4.94843200  | -1.36243800 |
| H | -5.29156400 | 2.15520500  | 1.54740200  |
| H | -7.78153000 | 5.35851800  | 0.12628100  |
| C | -2.85318400 | 1.34977400  | 0.01528500  |
| C | -1.84605500 | 3.37913600  | 0.10733900  |
| C | -0.85675500 | 2.35987100  | 0.09877400  |
| H | -1.65263700 | 4.44159700  | 0.17438500  |
| C | -3.08719600 | 2.77368800  | 0.06787600  |
| N | -1.50587100 | 1.17004400  | 0.04601700  |
| C | 1.35104900  | 3.63543300  | 0.23619000  |
| C | 2.60934000  | 1.75995100  | 0.19505600  |
| H | 1.18610300  | -0.33811200 | 0.01694700  |
| C | 2.65544700  | 3.22172500  | 0.29027900  |
| H | 0.98892300  | 4.65390500  | 0.30126600  |
| C | 0.54990200  | 2.44687700  | 0.14350500  |
| N | 1.32328800  | 1.34431600  | 0.11749100  |
| C | 3.83762400  | 4.08307800  | 0.41452400  |
| C | 3.93257700  | 5.23498700  | -0.37155100 |

|   |             |             |             |
|---|-------------|-------------|-------------|
| C | 4.85988800  | 3.79952600  | 1.33475300  |
| C | 5.02592200  | 6.08963600  | -0.24810400 |
| H | 3.16509400  | 5.46757500  | -1.10326200 |
| C | 5.94857200  | 4.65521600  | 1.44907200  |
| H | 4.77712000  | 2.93118000  | 1.98099100  |
| C | 6.04281100  | 5.79915800  | 0.66270700  |
| H | 6.73343300  | 4.43700700  | 2.16838500  |
| H | 6.89939600  | 6.46458700  | 0.75732900  |
| O | 5.05092200  | 7.18784400  | -1.04769300 |
| H | 5.85982800  | 7.68486900  | -0.86768400 |
| O | -5.89285500 | 6.37316000  | -1.48756100 |
| H | -6.77997100 | 6.74384000  | -1.39020000 |
| H | -7.45709400 | 3.35496200  | 1.54318100  |
| C | 3.74690500  | 0.93262000  | 0.12828500  |
| H | 4.68603600  | 1.47817700  | 0.17181400  |
| C | 3.89280400  | -0.44524200 | 0.00266400  |
| H | 4.91950000  | -0.80030500 | -0.01248800 |
| C | 3.17747800  | -2.89239900 | -0.22008600 |
| C | 0.94687400  | -2.48819600 | -0.12749500 |
| C | 1.93766900  | -3.50204500 | -0.21858600 |
| H | 1.74440200  | -4.56210200 | -0.31712500 |
| C | 2.94237400  | -1.47253700 | -0.10290600 |
| N | 1.59464000  | -1.29858600 | -0.05786900 |
| C | -1.26297200 | -3.76782000 | -0.18833600 |
| C | -2.52162400 | -1.89391300 | -0.10331300 |
| H | -1.09768100 | 0.20776500  | -0.00024000 |
| C | -2.56957700 | -3.35762700 | -0.15812800 |

|   |             |             |             |
|---|-------------|-------------|-------------|
| H | -0.90170200 | -4.78853900 | -0.20620500 |
| C | -0.46064800 | -2.57798400 | -0.12905600 |
| N | -1.23414600 | -1.47637400 | -0.07726200 |
| C | -3.75523800 | -4.22215200 | -0.17618600 |
| C | -4.81914900 | -4.00619300 | 0.70546200  |
| C | -3.81724400 | -5.30671900 | -1.06540200 |
| C | -5.92845200 | -4.85082500 | 0.69540600  |
| H | -4.78442800 | -3.20330200 | 1.43512000  |
| C | -4.92351600 | -6.14513300 | -1.06610500 |
| H | -3.00265900 | -5.46826500 | -1.76488900 |
| C | -5.98513100 | -5.92482700 | -0.19275500 |
| H | -4.96949100 | -6.97985200 | -1.76050700 |
| H | -6.85151800 | -6.58418400 | -0.19989200 |
| C | 4.47630400  | -3.56798900 | -0.32855400 |
| C | 4.71195400  | -4.72921000 | 0.41212300  |
| C | 5.47522400  | -3.09315200 | -1.19304500 |
| C | 5.92498400  | -5.40582300 | 0.29995100  |
| H | 3.96282000  | -5.10709100 | 1.10113100  |
| C | 6.68310500  | -3.77160800 | -1.29568200 |
| H | 5.28614000  | -2.21804900 | -1.80672900 |
| C | 6.91880400  | -4.92480600 | -0.55392000 |
| H | 7.45179000  | -3.40612000 | -1.97122900 |
| H | 7.86803800  | -5.45091900 | -0.63975900 |
| C | -3.65583100 | -1.06048100 | -0.15489500 |
| H | -4.59132400 | -1.60354500 | -0.26186200 |
| C | -3.80117100 | 0.32224300  | -0.10843600 |
| H | -4.82348700 | 0.68133000  | -0.18809100 |

|   |             |             |            |
|---|-------------|-------------|------------|
| O | -6.92117900 | -4.58136100 | 1.58364300 |
| H | -7.61424200 | -5.24757300 | 1.48580100 |
| O | 6.08438500  | -6.52416100 | 1.05374000 |
| H | 6.96465700  | -6.88787600 | 0.89038600 |

*m*-THPPo (  $S_2$  )

|   |            |            |            |
|---|------------|------------|------------|
| C | -5.8820179 | 5.2012428  | -0.6726919 |
| C | -4.6555499 | 4.5410644  | -0.6985638 |
| C | -4.4567159 | 3.3782183  | 0.0533724  |
| C | -5.5108756 | 2.8903279  | 0.8447152  |
| C | -6.7323104 | 3.5520027  | 0.8604615  |
| C | -6.9296690 | 4.7043330  | 0.1055389  |
| H | -3.8648301 | 4.9307342  | -1.3321840 |
| H | -5.3539848 | 2.0210834  | 1.4752753  |
| H | -7.8891216 | 5.2185145  | 0.1242670  |
| C | -2.8856433 | 1.3098843  | -0.0062553 |
| C | -1.9087972 | 3.3552942  | 0.0540399  |
| C | -0.9084992 | 2.3579842  | 0.0546212  |
| H | -1.7351020 | 4.4214016  | 0.1129559  |
| C | -3.1483988 | 2.7204189  | 0.0316558  |
| N | -1.5286471 | 1.1536259  | 0.0195369  |
| C | 1.2866933  | 3.6669742  | 0.1848309  |
| C | 2.5834705  | 1.8123037  | 0.1871728  |
| H | 1.1940568  | -0.3259224 | 0.0086653  |
| C | 2.6040445  | 3.2761344  | 0.2694768  |

|   |            |            |            |
|---|------------|------------|------------|
| H | 0.9030288  | 4.6780195  | 0.2387805  |
| C | 0.5143624  | 2.4673492  | 0.1018024  |
| N | 1.3011614  | 1.3736114  | 0.0999607  |
| C | 3.7664620  | 4.1519294  | 0.4051703  |
| C | 3.8259910  | 5.3429677  | -0.3292120 |
| C | 4.8156123  | 3.8495214  | 1.2940442  |
| C | 4.9080613  | 6.2085507  | -0.1919834 |
| H | 3.0408913  | 5.5933046  | -1.0357362 |
| C | 5.8913664  | 4.7181057  | 1.4239305  |
| H | 4.7582530  | 2.9576951  | 1.9097307  |
| C | 5.9505088  | 5.8959497  | 0.6844833  |
| H | 6.6933490  | 4.4841257  | 2.1188402  |
| H | 6.7983556  | 6.5708822  | 0.7892214  |
| O | 4.9019731  | 7.3391478  | -0.9436581 |
| H | 5.7082292  | 7.8402367  | -0.7608001 |
| O | -6.0031509 | 6.3197980  | -1.4329601 |
| H | -6.8994811 | 6.6683144  | -1.3342687 |
| H | -7.5420685 | 3.1754103  | 1.4795622  |
| C | 3.7360938  | 1.0023363  | 0.1174965  |
| H | 4.6674042  | 1.5607127  | 0.1519265  |
| C | 3.9046388  | -0.3760548 | -0.0006714 |
| H | 4.9385241  | -0.7108811 | -0.0019712 |
| C | 3.2401416  | -2.8391918 | -0.2051679 |
| C | 1.0018186  | -2.4830488 | -0.0999103 |
| C | 2.0022835  | -3.4771857 | -0.1794091 |

|   |            |            |            |
|---|------------|------------|------------|
| H | 1.8274803  | -4.5414738 | -0.2629286 |
| C | 2.9776329  | -1.4315933 | -0.1087728 |
| N | 1.6208663  | -1.2788859 | -0.0571007 |
| C | -1.1918833 | -3.7965455 | -0.1499450 |
| C | -2.4950856 | -1.9476705 | -0.0741753 |
| H | -1.1021339 | 0.1992633  | -0.0122973 |
| C | -2.5144208 | -3.4136711 | -0.1134873 |
| H | -0.8065598 | -4.8083525 | -0.1544989 |
| C | -0.4217356 | -2.5950654 | -0.0988378 |
| N | -1.2115503 | -1.5043288 | -0.0526479 |
| C | -3.6721099 | -4.3043115 | -0.1261879 |
| C | -4.7920256 | -4.0634575 | 0.6802957  |
| C | -3.6568386 | -5.4535735 | -0.9390079 |
| C | -5.8757789 | -4.9393198 | 0.6668200  |
| H | -4.8179559 | -3.2177339 | 1.3599156  |
| C | -4.7385465 | -6.3214921 | -0.9435322 |
| H | -2.8018427 | -5.6368791 | -1.5824810 |
| C | -5.8544968 | -6.0728681 | -0.1477771 |
| H | -4.7238994 | -7.2020101 | -1.5803044 |
| H | -6.7022165 | -6.7558954 | -0.1570415 |
| C | 4.5468740  | -3.4907781 | -0.3182123 |
| C | 4.7971681  | -4.6655506 | 0.3985407  |
| C | 5.5467358  | -2.9834666 | -1.1658688 |
| C | 6.0222749  | -5.3188594 | 0.2829554  |
| H | 4.0493032  | -5.0702606 | 1.0735672  |

|   |            |            |            |
|---|------------|------------|------------|
| C | 6.7670539  | -3.6386180 | -1.2714263 |
| H | 5.3461824  | -2.1038068 | -1.7692945 |
| C | 7.0162829  | -4.8030348 | -0.5512442 |
| H | 7.5341070  | -3.2476311 | -1.9344495 |
| H | 7.9743627  | -5.3123425 | -0.6402852 |
| C | -3.6425468 | -1.1310408 | -0.1593363 |
| H | -4.5686146 | -1.6858803 | -0.2812345 |
| C | -3.8087898 | 0.2524520  | -0.1344324 |
| H | -4.8364394 | 0.5902729  | -0.2385406 |
| O | -6.9235690 | -4.6437808 | 1.4785018  |
| H | -7.5905913 | -5.3381262 | 1.3918876  |
| O | 6.1961694  | -6.4501687 | 1.0134349  |
| H | 7.0855528  | -6.7925079 | 0.8510336  |

**Cartesian coordinates (Angstrom) for the optimized ground ( $S_0$ ) structures of *m*-THPC calculated at PBE0/6-31G(d) level of theory.**

*m*-THPC ( $S_0$ )

|   |             |             |             |
|---|-------------|-------------|-------------|
| C | -4.17650400 | -1.17368200 | -0.16381500 |
| C | -4.32384900 | 0.17387000  | -0.16224600 |
| C | -2.98557000 | 0.72606000  | -0.18870800 |
| C | -2.75061000 | -1.42329500 | -0.17170100 |
| H | -4.95170500 | -1.92716400 | -0.15906200 |
| H | -5.24348300 | 0.74187600  | -0.14131800 |
| N | -2.04596900 | -0.25865300 | -0.18862500 |



|   |             |            |             |
|---|-------------|------------|-------------|
| C | -2.72686100 | 2.11511300 | -0.19933500 |
| C | -1.46250400 | 2.70380200 | -0.19583400 |
| C | -1.15613300 | 4.09638000 | -0.26763100 |
| C | 0.78002200  | 2.92478200 | -0.20917200 |
| C | 0.20442200  | 4.23167100 | -0.26976800 |
| H | -1.89537000 | 4.88251100 | -0.32040700 |
| H | 0.77679300  | 5.14670100 | -0.32088600 |
| N | -0.25634600 | 2.04152900 | -0.16267100 |
| H | -0.17330200 | 1.03231300 | -0.12964600 |
| C | -3.89220900 | 3.04502300 | -0.23475200 |
| C | -4.15306500 | 3.88739600 | 0.84651200  |
| C | -4.73162900 | 3.08658100 | -1.35630200 |
| C | -5.24015400 | 4.76179600 | 0.81382800  |
| H | -3.52356000 | 3.86470600 | 1.73074800  |
| C | -5.81138200 | 3.96072700 | -1.38255700 |
| H | -4.52645600 | 2.43648900 | -2.20115500 |
| C | -6.07342300 | 4.80073500 | -0.30394400 |
| H | -6.45857000 | 3.99549200 | -2.25489000 |
| H | -6.92157400 | 5.48305400 | -0.32996500 |
| O | -5.43701200 | 5.54911400 | 1.90374000  |
| H | -6.22431900 | 6.09013200 | 1.75804500  |
| C | 2.15651000  | 2.63226500 | -0.21778500 |
| C | 3.07619500  | 3.81297100 | -0.24564500 |
| C | 3.43886700  | 4.44570800 | 0.94284400  |
| C | 3.58140800  | 4.29258600 | -1.46057500 |
| C | 4.30164300  | 5.54305800 | 0.92473400  |
| H | 3.05316200  | 4.09605800 | 1.89592500  |

|   |            |             |             |
|---|------------|-------------|-------------|
| C | 4.43979200 | 5.38643000  | -1.47342400 |
| H | 3.29076400 | 3.80823000  | -2.38842400 |
| C | 4.80571900 | 6.01564000  | -0.28724600 |
| H | 4.82912200 | 5.76008400  | -2.41684000 |
| H | 5.47799000 | 6.87205900  | -0.30271500 |
| O | 4.61323500 | 6.10916200  | 2.11957100  |
| H | 5.20766700 | 6.85536600  | 1.96543300  |
| C | 2.73708700 | 1.36559200  | -0.21133100 |
| C | 4.24433400 | 1.19346700  | -0.21555500 |
| C | 4.41021400 | -0.32054800 | -0.17785800 |
| H | 4.69818900 | 1.69991700  | 0.64296000  |
| H | 4.68655300 | 1.64978000  | -1.10771900 |
| C | 2.97602500 | -0.81496700 | -0.19468500 |
| H | 4.97182800 | -0.71610700 | -1.03087900 |
| H | 4.93155300 | -0.67061800 | 0.71960800  |
| N | 2.07655800 | 0.18998200  | -0.20350200 |
| C | 2.68283900 | -2.17674800 | -0.20157900 |
| C | 3.83456500 | -3.13280200 | -0.19606400 |
| C | 4.41893000 | -3.52036300 | 1.00922400  |
| C | 4.33468500 | -3.64781500 | -1.39848000 |
| C | 5.49541100 | -4.40885900 | 1.01951300  |
| H | 4.04045200 | -3.14248500 | 1.95452100  |
| C | 5.40638500 | -4.53396200 | -1.38288500 |
| H | 3.87602100 | -3.35237600 | -2.33765200 |
| C | 5.99257800 | -4.91797100 | -0.18060800 |
| H | 5.79325700 | -4.93458600 | -2.31619200 |
| H | 6.83151100 | -5.61208700 | -0.17380100 |

|   |             |             |             |
|---|-------------|-------------|-------------|
| O | 6.01506800  | -4.74284600 | 2.22936500  |
| H | 6.74176900  | -5.36564000 | 2.09535900  |
| C | 1.40144800  | -2.75865600 | -0.21043300 |
| C | 1.12092800  | -4.15930500 | -0.16849100 |
| C | -0.83588900 | -3.02440500 | -0.20663400 |
| C | -0.23708900 | -4.31954200 | -0.16050100 |
| H | 1.87718400  | -4.93020100 | -0.13242600 |
| H | -0.79032900 | -5.24647000 | -0.11368500 |
| N | 0.19942100  | -2.11808300 | -0.23809100 |
| H | 0.06423400  | -1.11412700 | -0.25626300 |
| C | -2.19720600 | -2.72282100 | -0.18220700 |
| C | -3.12938800 | -3.88730800 | -0.16482200 |
| C | -3.22751600 | -4.73226600 | -1.27818600 |
| C | -3.90739000 | -4.14852600 | 0.96351500  |
| C | -4.09617600 | -5.81716400 | -1.25208200 |
| H | -2.62922000 | -4.52536300 | -2.16024900 |
| C | -4.77608800 | -5.23998800 | 0.98339600  |
| H | -3.84219200 | -3.51181900 | 1.84034500  |
| C | -4.87267400 | -6.07879100 | -0.12740800 |
| H | -4.17618600 | -6.46792000 | -2.11877900 |
| H | -5.55137100 | -6.93009300 | -0.11197600 |
| O | -5.49958600 | -5.43777000 | 2.11627400  |
| H | -6.04989500 | -6.22362900 | 2.00070000  |
